# Supplementary material for: Synthesis and rotational dynamics of diazamacrocycles having bridged 1,4-naphthylene as framed molecular rotors
Source: Royal Society of Chemistry journal article supplement (doi:10.1039/d2ob01613c), 2022-01-01
Supplement: d2ob01613c1.pdf [file d2ob01613c1.pdf]

## Supplementary Information

### Synthesis and Rotational Dynamics of Diazamacrocycles Having Bridged 1,4-Naphthylene as Framed Molecular Rotors

Taichi Kurimoto,<sup>a</sup> Yusuke Inagaki,<sup>a</sup> Kazuaki Ohara,<sup>b</sup> Kentaro Yamaguchi,<sup>b</sup> and Wataru Setaka\*,<sup>a</sup>

<sup>a</sup> Division of Applied Chemistry, Faculty of Urban Environmental Sciences, Tokyo Metropolitan University, 1-1 Minami-Osawa, Hachioji, Tokyo 192-0397, Japan.

<sup>b</sup> Faculty of Pharmaceutical Sciences at Kagawa Campus, Tokushima Bunri University, 1314-1 Shido, Sanuki, Kagawa 769-2193, Japan.

#### Table of Contents:

#### 1. Copies of NMR and HRMS Spectra for All New Compounds

**Fig. S1.** <sup>1</sup>H NMR spectrum of **C12Np** in C<sub>6</sub>D<sub>6</sub>.

**Fig. S2.** <sup>13</sup>C NMR spectrum of **C12Np** in C<sub>6</sub>D<sub>6</sub>.

**Fig. S3.** HRMS spectrum of **C12Np** (APCI, positive). Top: obsd. Bottom: sim.

**Fig. S4.** <sup>1</sup>H NMR spectrum of **C14Np** in C<sub>6</sub>D<sub>6</sub>.

**Fig. S5.** <sup>13</sup>C NMR spectrum of **C14Np** in C<sub>6</sub>D<sub>6</sub>.

**Fig. S6.** HRMS spectrum of **C14Np** (APCI, positive). Top: obsd. Bottom: sim.

**Fig. S7.** <sup>1</sup>H NMR spectrum of **C16Np** in C<sub>6</sub>D<sub>6</sub>.

**Fig. S8.** <sup>13</sup>C NMR spectrum of **C16Np** in C<sub>6</sub>D<sub>6</sub>.

**Fig. S9.** HRMS spectrum of **C16Np** (APCI, positive). Top: obsd. Bottom: sim.

**Fig. S10.** <sup>1</sup>H NMR spectrum of **C18Np** in C<sub>6</sub>D<sub>6</sub>.

**Fig. S11.** <sup>13</sup>C NMR spectrum of **C18Np** in C<sub>6</sub>D<sub>6</sub>.

**Fig. S12.** HRMS spectrum of **C18Np** (APCI, positive). Top: obsd. Bottom: sim.

#### 2. Details of NMR Study

**Fig. S13.** <sup>1</sup>H -<sup>1</sup>H NOESY spectrum of **C14Np** in C<sub>6</sub>D<sub>6</sub>.

**Fig. S14.** <sup>1</sup>H -<sup>1</sup>H NOESY spectrum of **C16Np** in C<sub>6</sub>D<sub>6</sub>.

**Fig. S15.** <sup>1</sup>H -<sup>1</sup>H NOESY spectrum of **C18Np** in C<sub>6</sub>D<sub>6</sub>.

**Fig. S16.** Temperature dependent <sup>1</sup>H NMR spectra of **C16Np** in toluene-*d*<sub>8</sub>.

**Fig. S17.** <sup>1</sup>H -<sup>1</sup>H EXSY(NOESY) spectra of **C16Np** at 300 K in toluene-*d*<sub>8</sub>: (a) mixing time = 300 ms, (b) mixing time = 100 ms, (c) mixing time = 50 ms.

**Fig. S18.** <sup>1</sup>H -<sup>1</sup>H EXSY(NOESY) spectra of **C16Np** in toluene-*d*<sub>8</sub> (mixing time = 300 ms): (a) 300 K, (b) 350 K.

**Fig. S19.** Temperature dependent <sup>1</sup>H NMR spectra of **C18Np** in toluene-*d*<sub>8</sub>.

**Fig. S20.** Eyring plot for temperature dependent exchange rates for the rotation of the rotor in compound **C18Np**.

#### 3. Details of X-ray Crystallography

**Table S1.** Crystal Data

**Fig. S21.** (a) An ORTEP drawing (50% thermal ellipsoids) of molecular structure and (b) crystal packing structure of **C12Np** determined by X-ray crystallography.

**Fig. S22.** (a) An ORTEP drawing (50% thermal ellipsoids) of molecular structure (the population ratio of the disordered atoms: chain A: chain B = 0.843 (10) : 0.157(10) ) and (b) crystal packing structure of **C14Np** determined by X-ray crystallography.

# 1. Copies of NMR and HRMS Spectra for All New Compounds

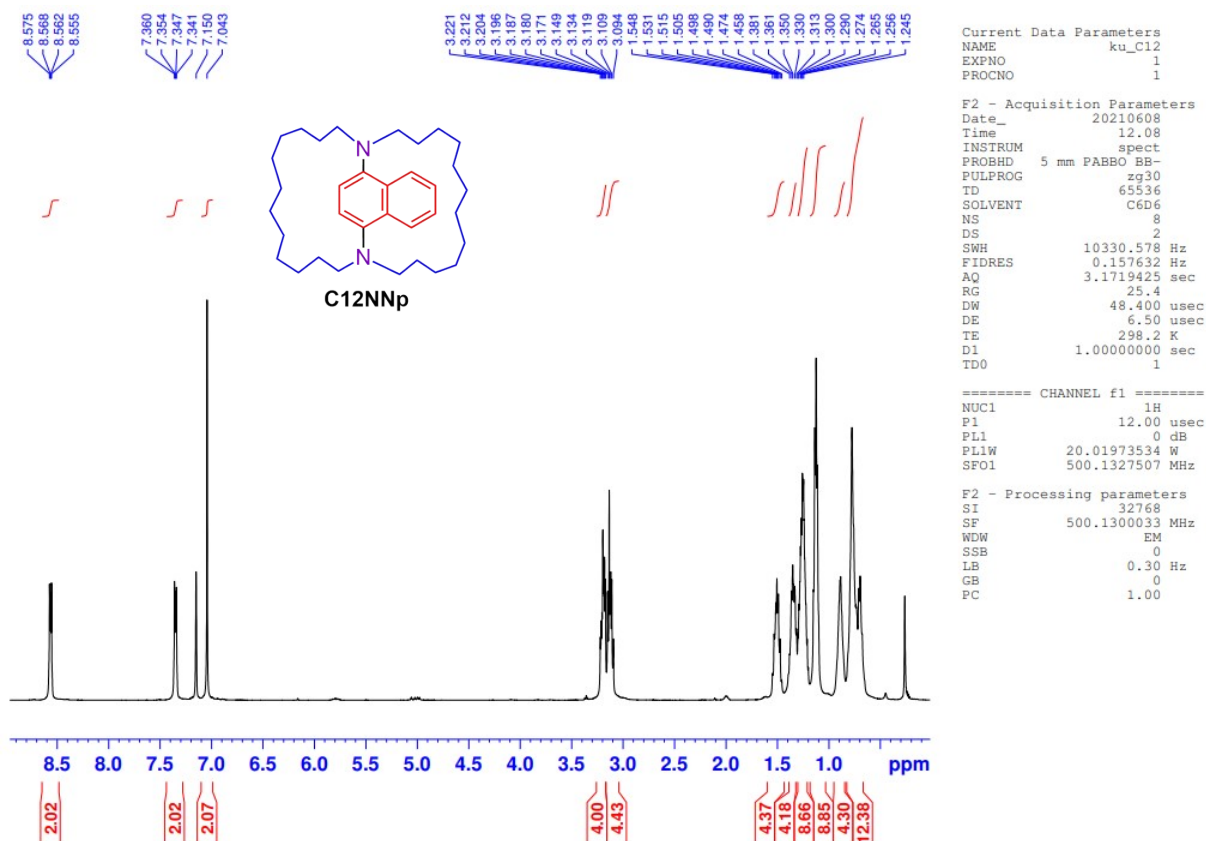

Fig. S1. <sup>1</sup>H NMR spectrum of C12Np in C<sub>6</sub>D<sub>6</sub>.

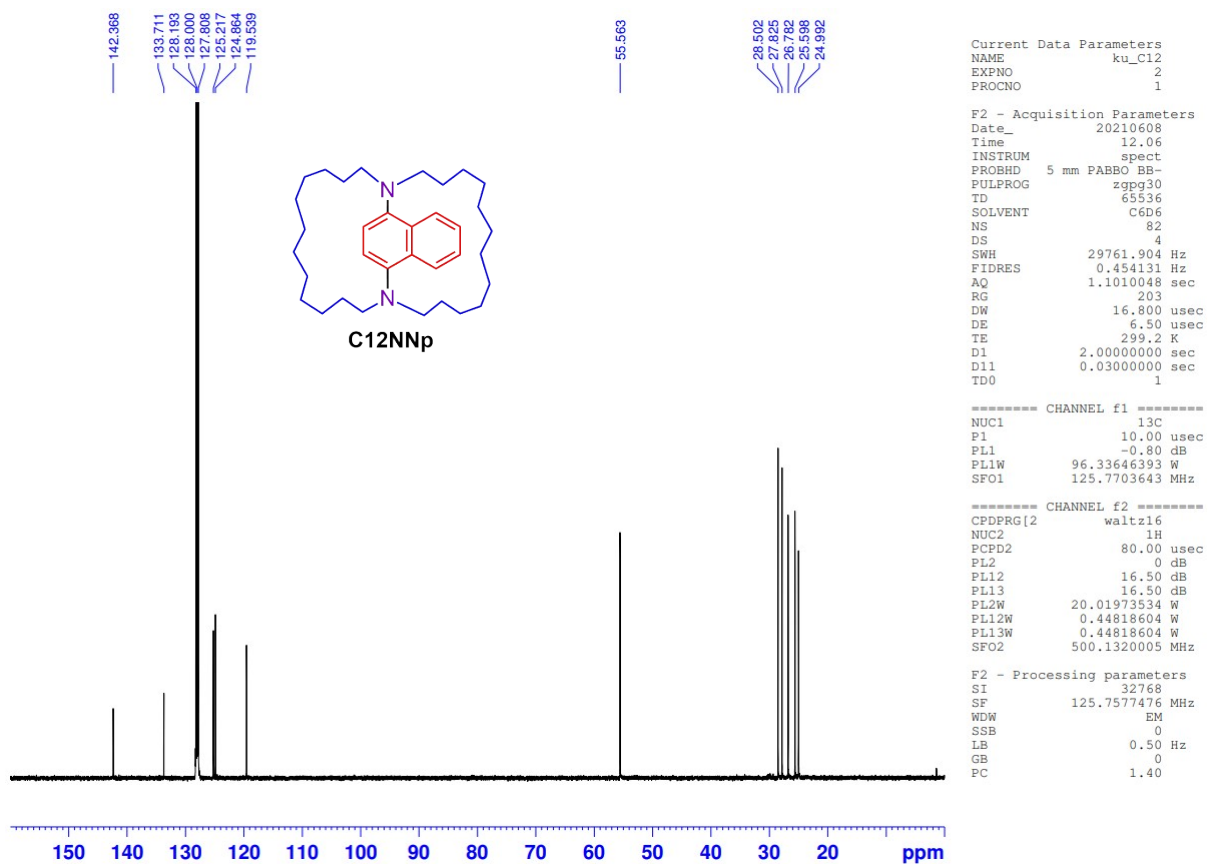

Fig. S2. <sup>13</sup>C NMR spectrum of C12Np in C<sub>6</sub>D<sub>6</sub>.

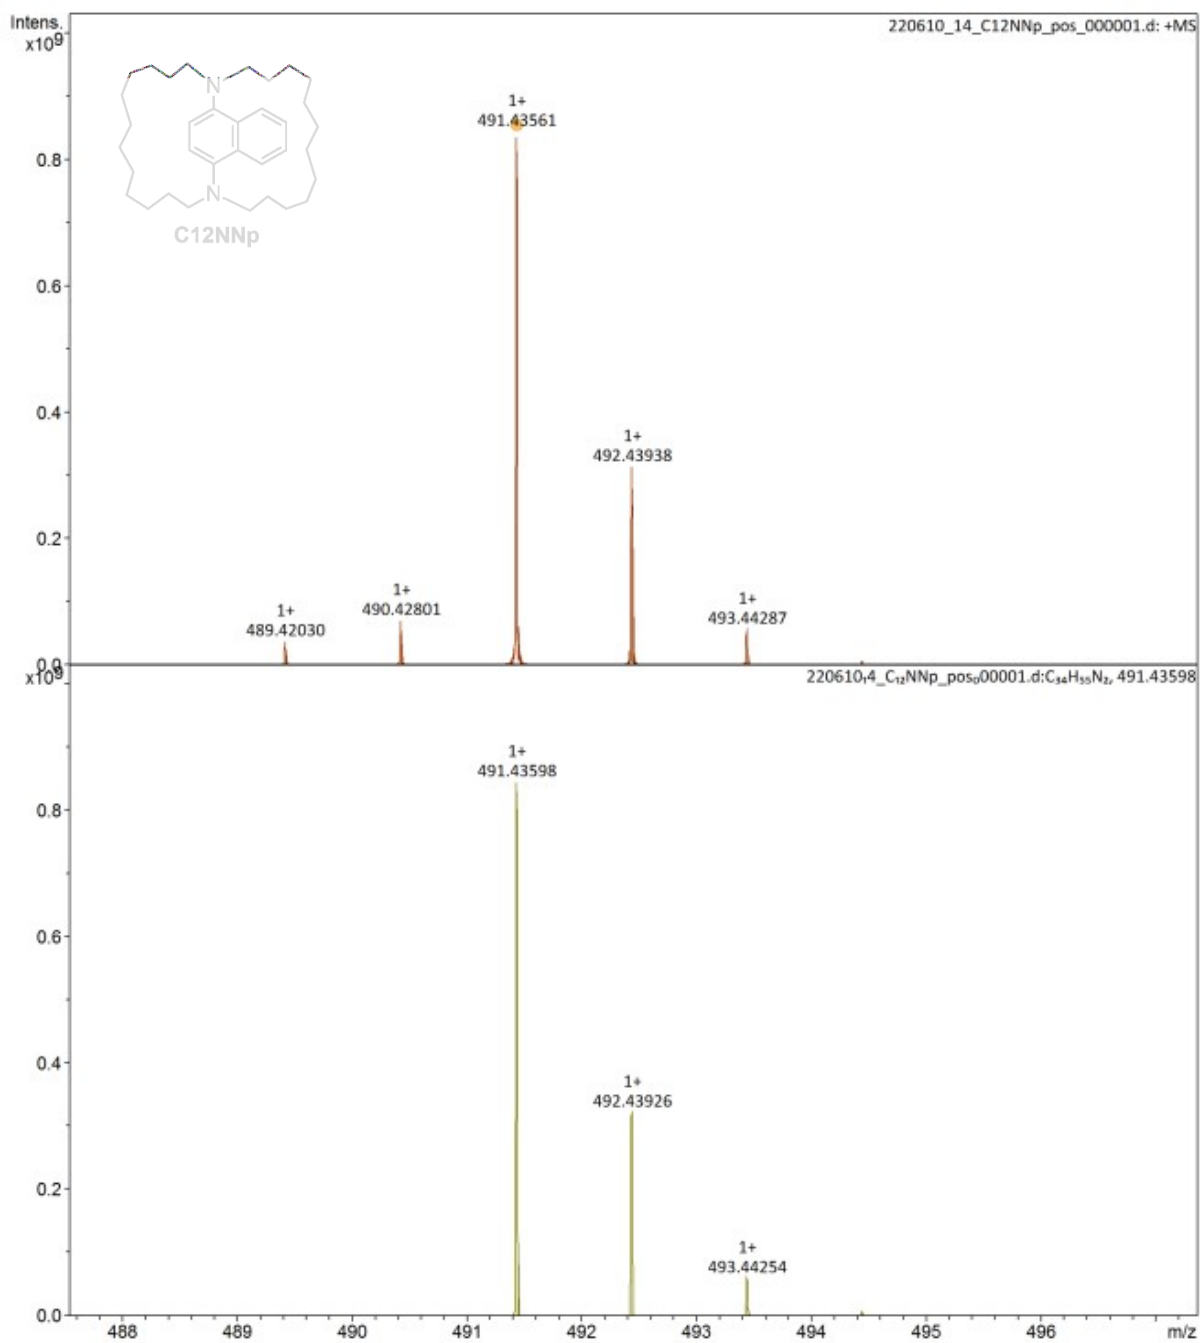

Fig. S3. HRMS spectrum of C12Np (APCI, positive). Top: obsd. Bottom: sim.

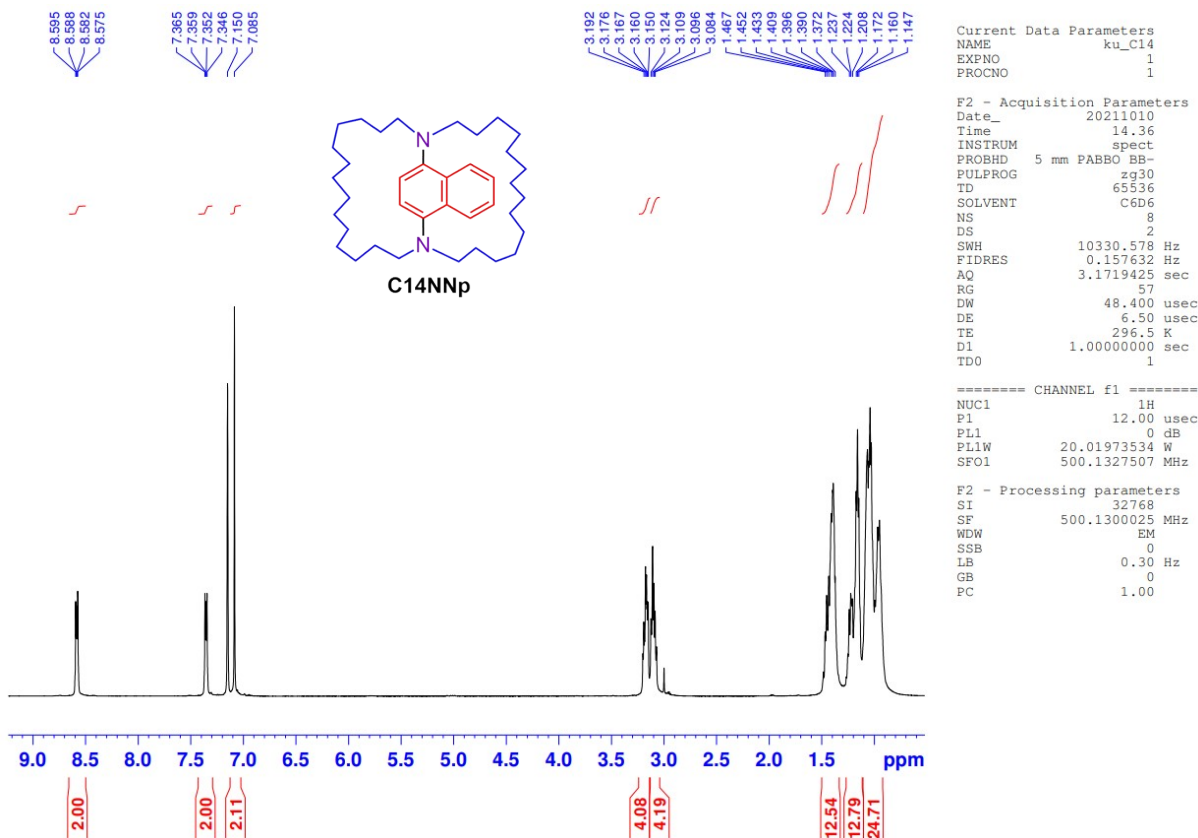

Fig. S4. <sup>1</sup>H NMR spectrum of C14Np in C<sub>6</sub>D<sub>6</sub>.

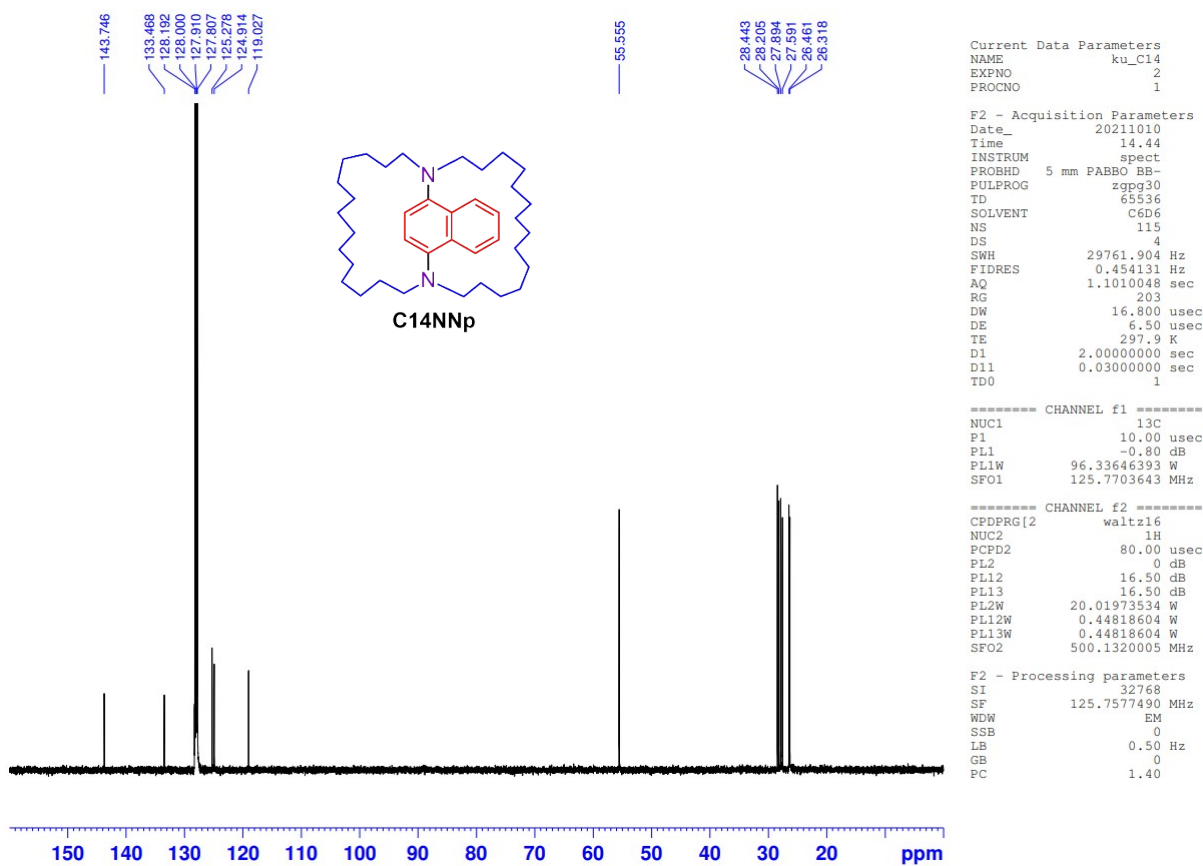

Fig. S5. <sup>13</sup>C NMR spectrum of C14Np in C<sub>6</sub>D<sub>6</sub>.

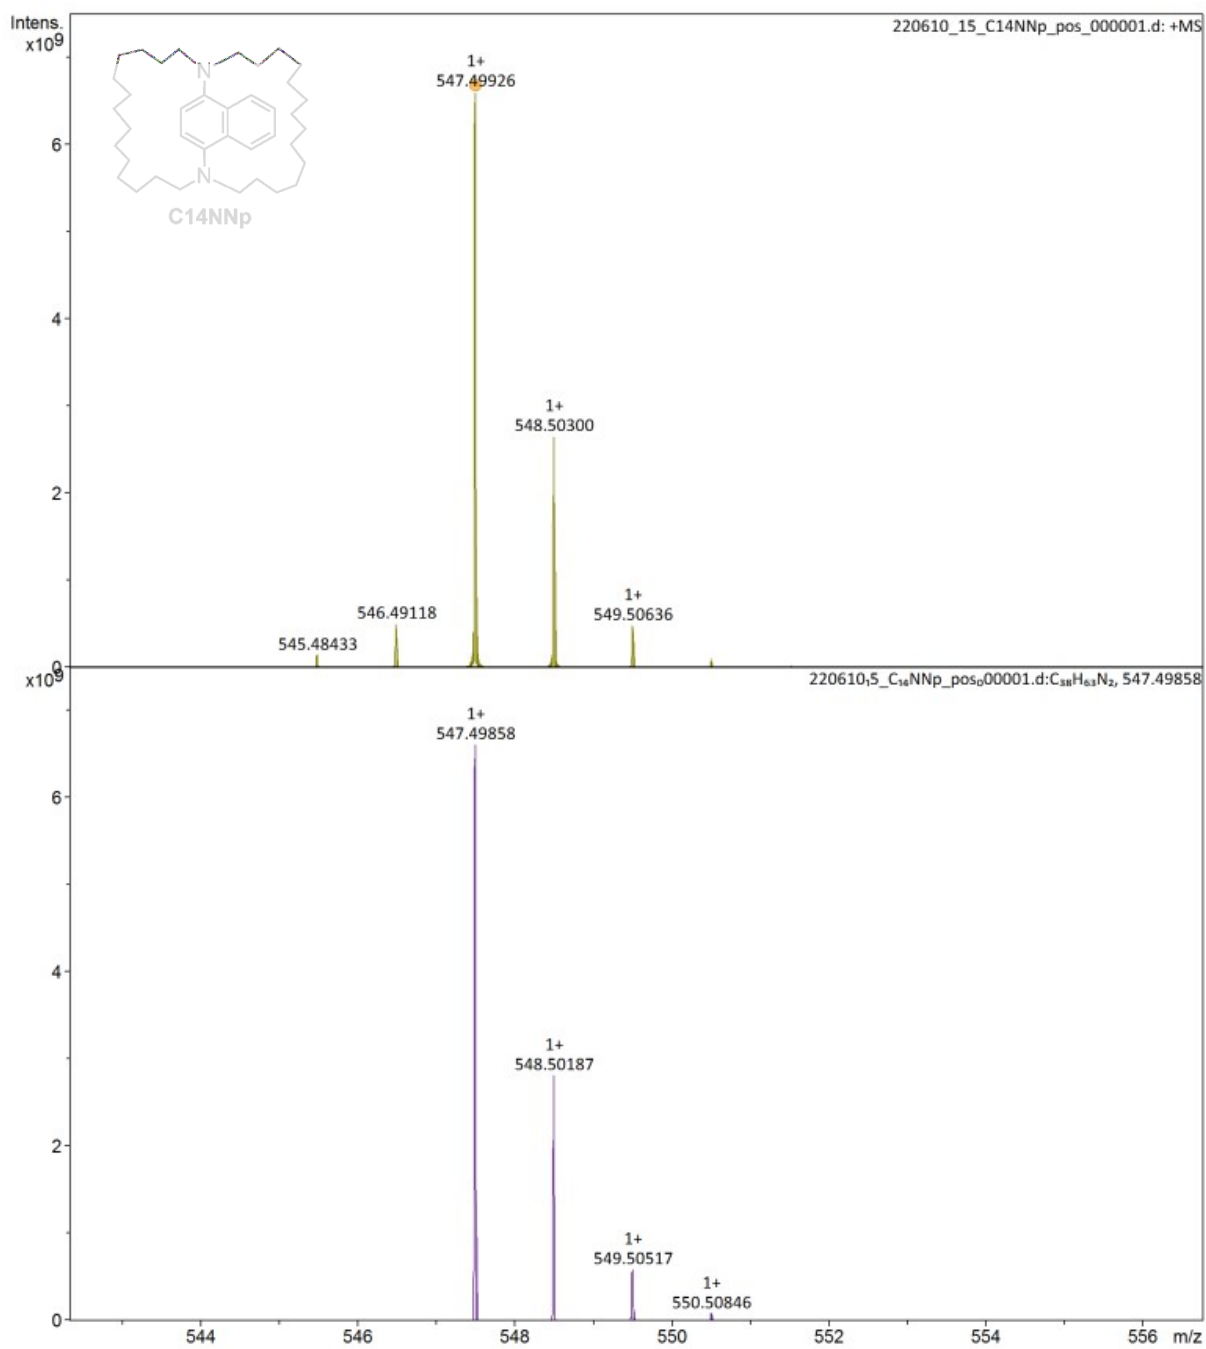

**Fig. S6.** HRMS spectrum of C14NNp (APCI, positive). Top: obsd. Bottom: sim.

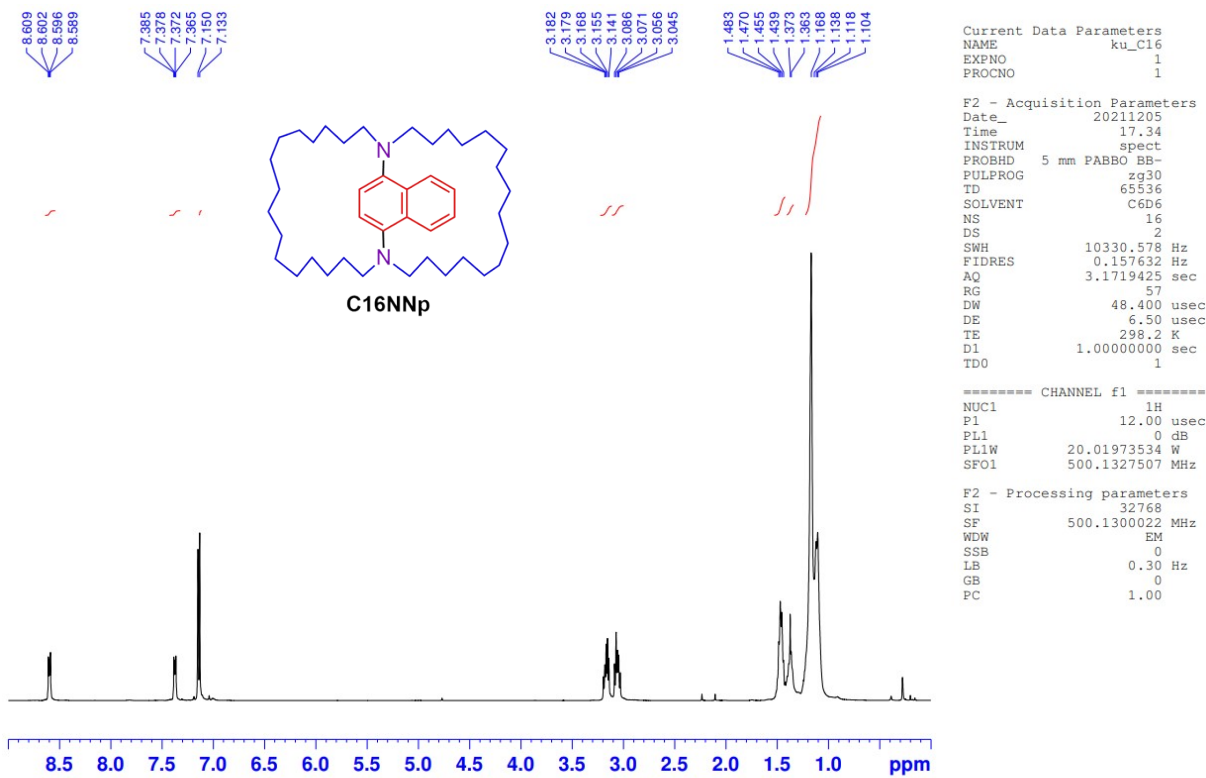

Fig. S7. <sup>1</sup>H NMR spectrum of C16Nnp in C<sub>6</sub>D<sub>6</sub>.

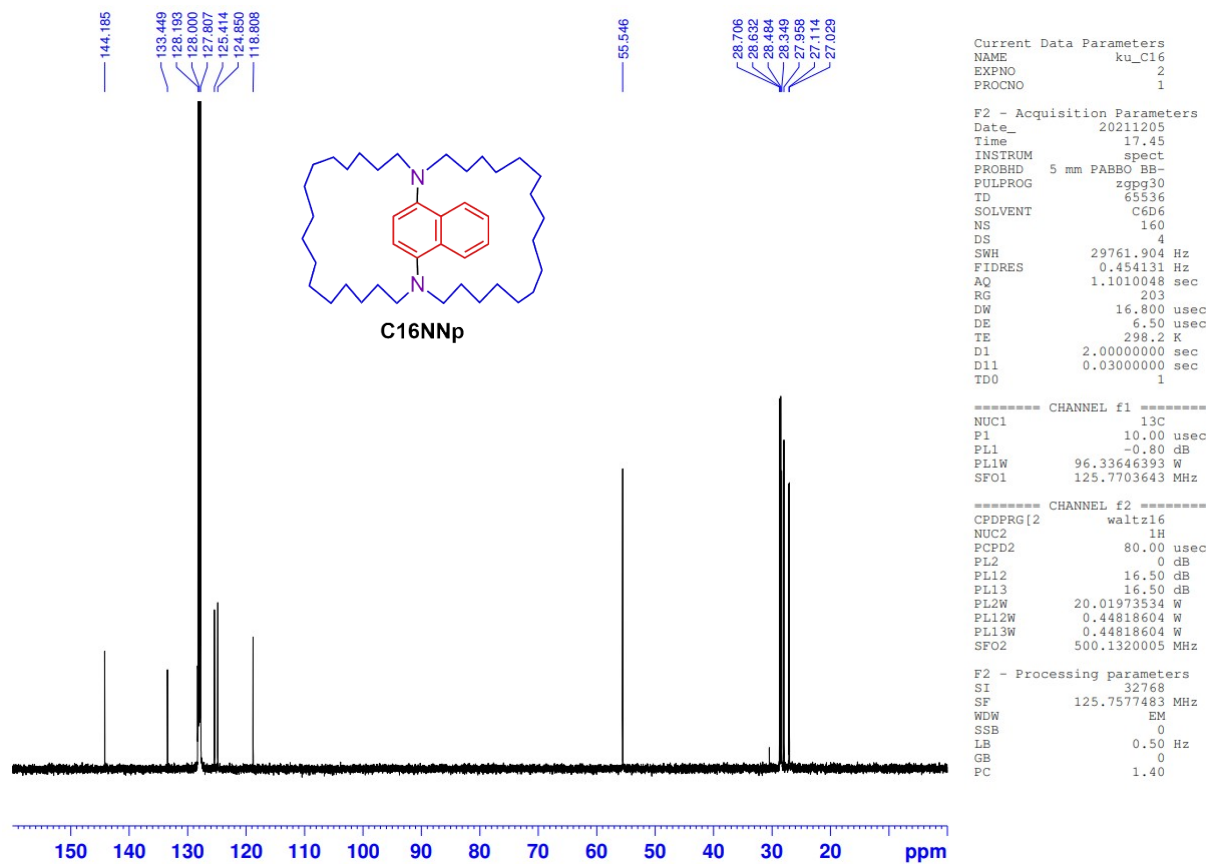

Fig. S8. <sup>13</sup>C NMR spectrum of C16Nnp in C<sub>6</sub>D<sub>6</sub>.

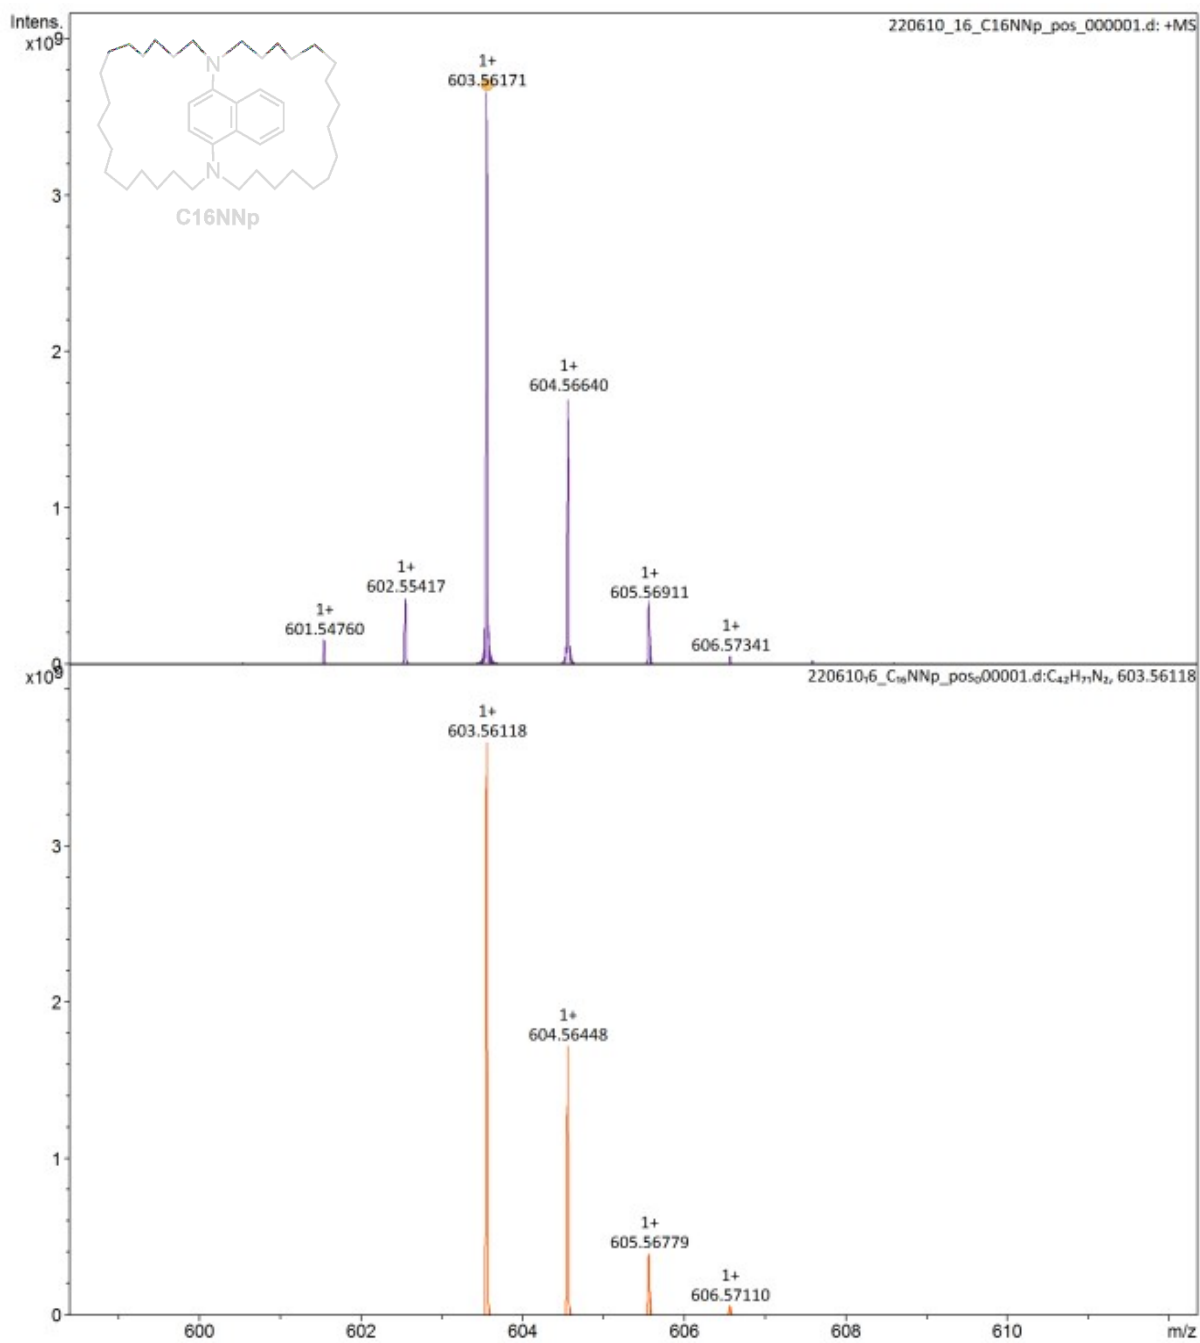

Fig. S9. HRMS spectrum of C16Np (APCI, positive). Top: obsd. Bottom: sim.

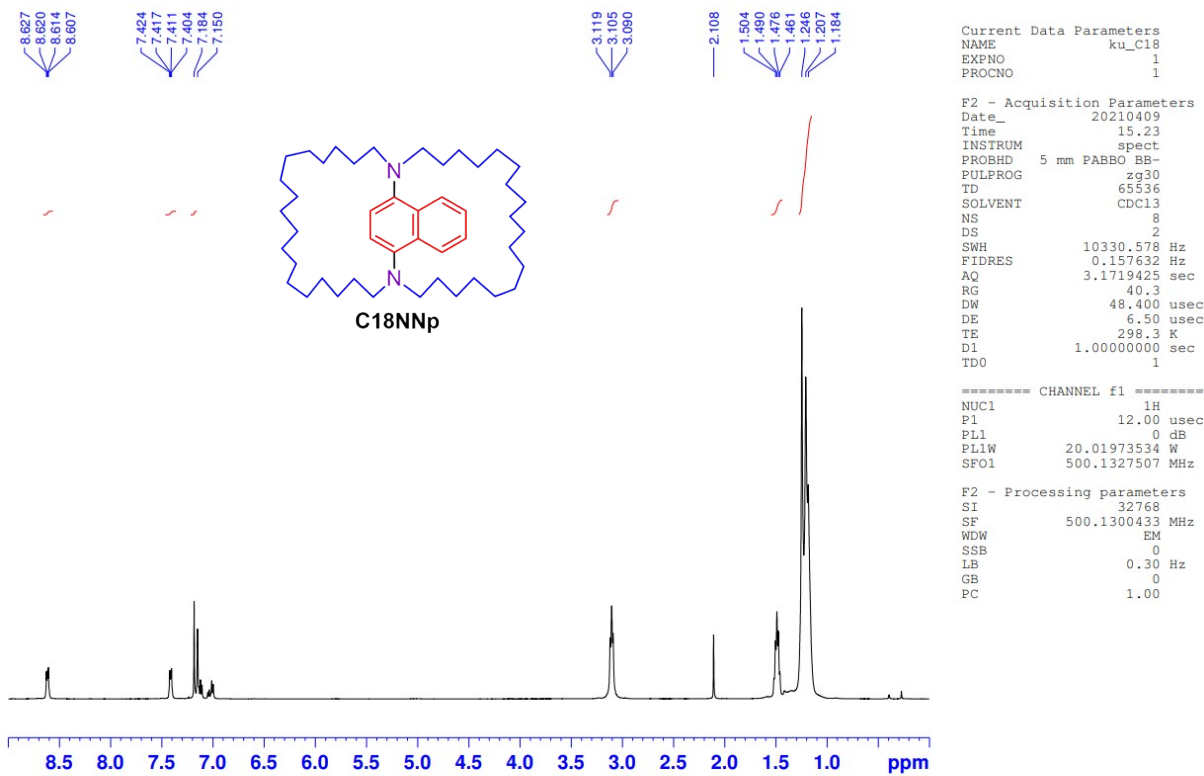

Fig. S10.  $^1\text{H}$  NMR spectrum of C18Nnp in  $\text{C}_6\text{D}_6$ .

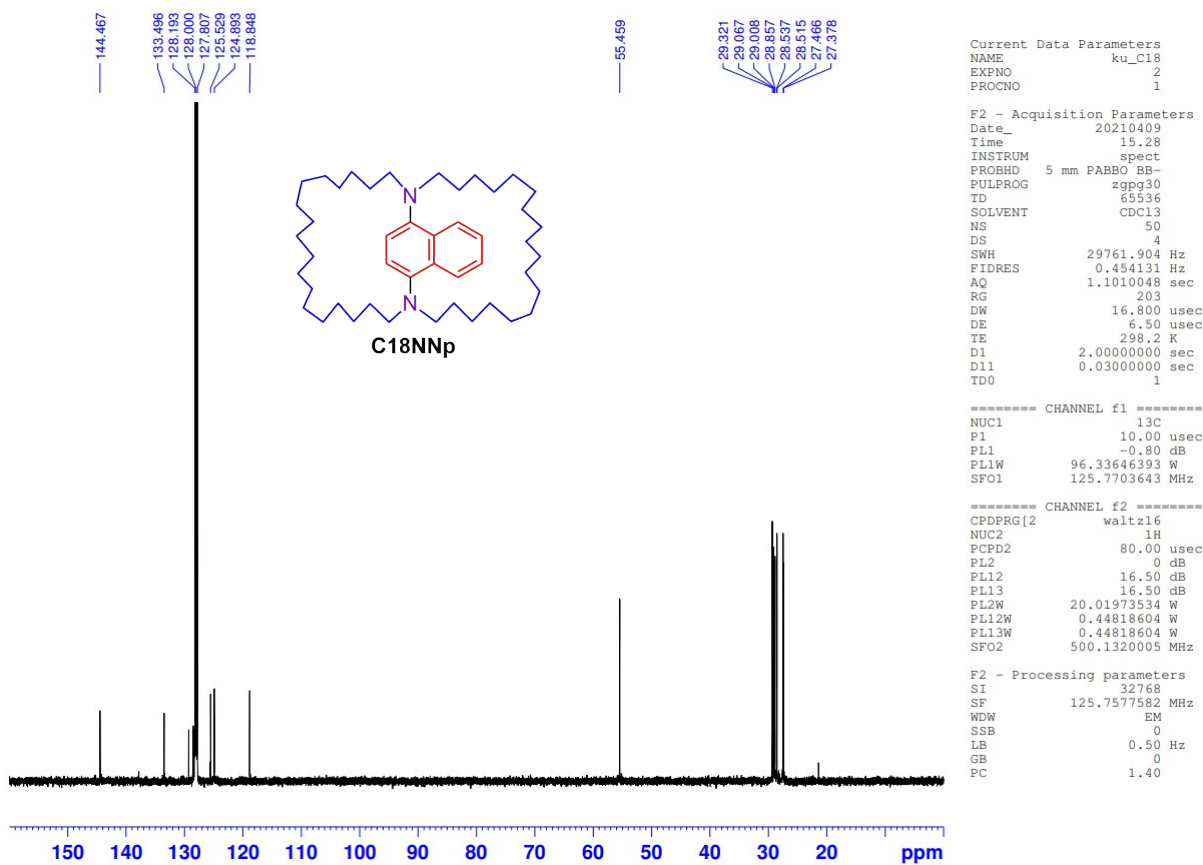

Fig. S11.  $^{13}\text{C}$  NMR spectrum of C18Nnp in  $\text{C}_6\text{D}_6$ .



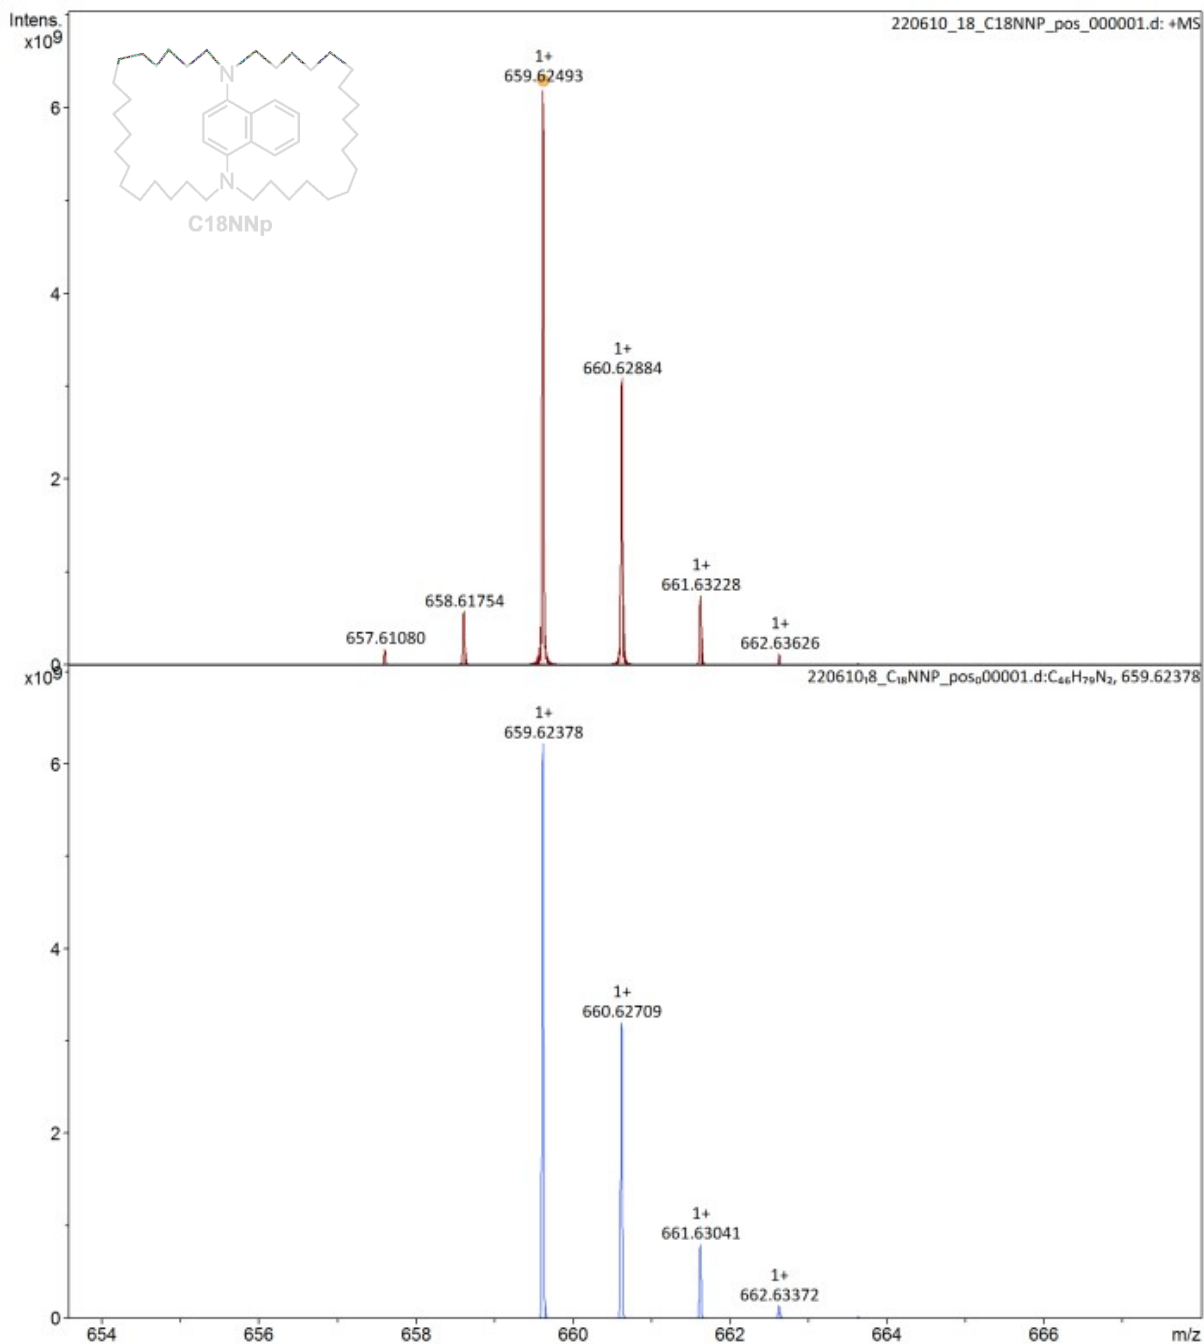

**Fig. S12.** HRMS spectrum of C18Nnp (APCI, positive). Top: obsd. Bottom: sim.

## 2. Details of NMR Study

### a. NOESY NMR Study

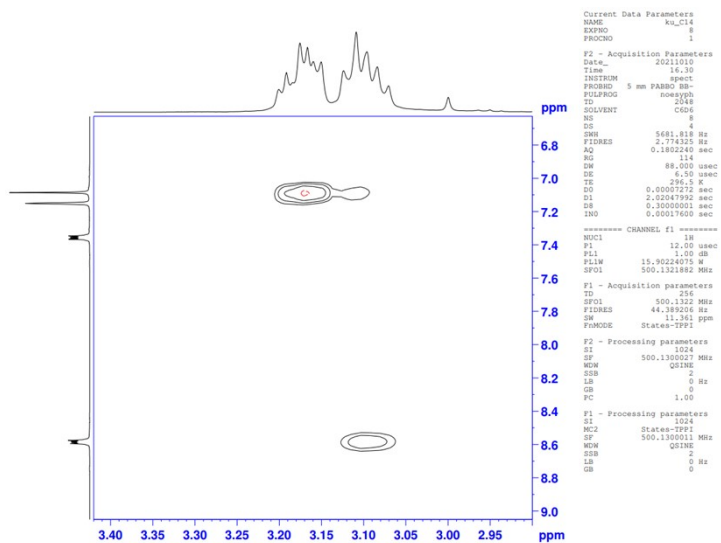

Fig. S13.  $^1\text{H}$  -  $^1\text{H}$  NOESY spectrum of **C14Np** in  $\text{C}_6\text{D}_6$ .

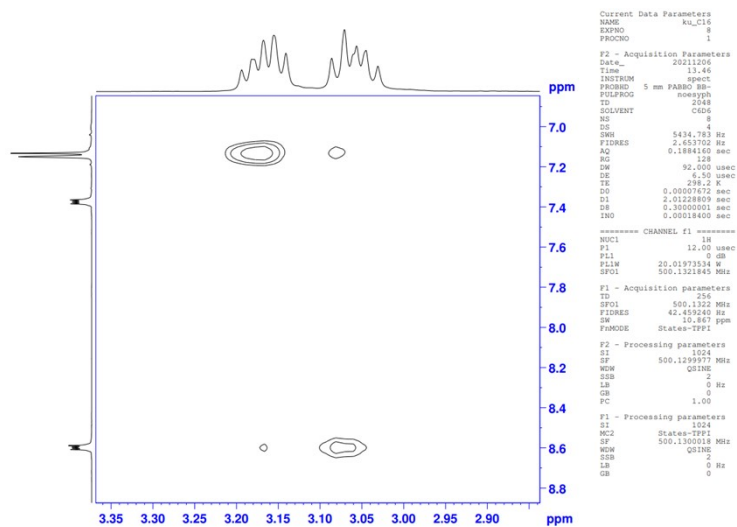

Fig. S14.  $^1\text{H}$  -  $^1\text{H}$  NOESY spectrum of **C16Np** in  $\text{C}_6\text{D}_6$ .

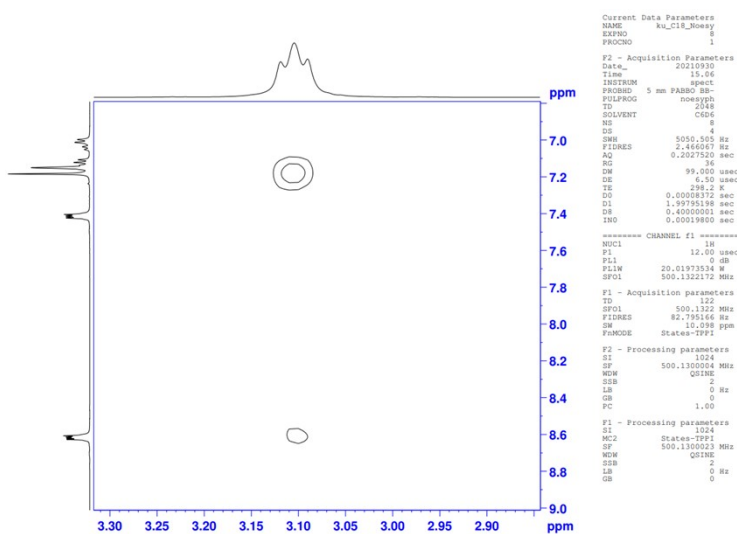

Fig. S15.  $^1\text{H}$  -  $^1\text{H}$  NOESY spectrum of **C18Np** in  $\text{C}_6\text{D}_6$ .

## b. Temperature Dependent NMR of C16Np

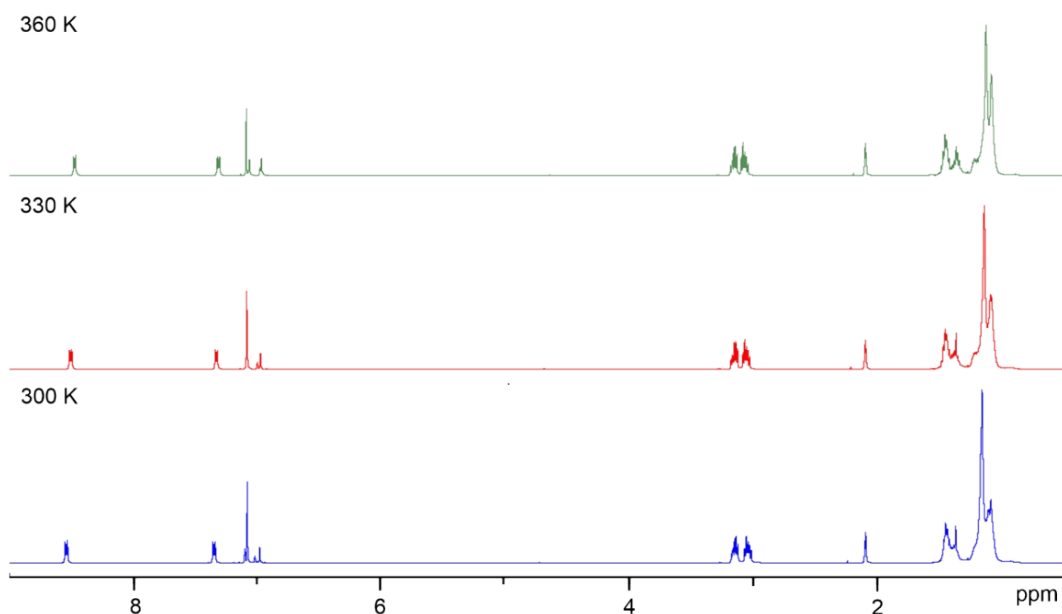

Fig. S16. Temperature dependent  $^1\text{H}$  NMR spectra of **C16Np** in toluene- $d_8$ .

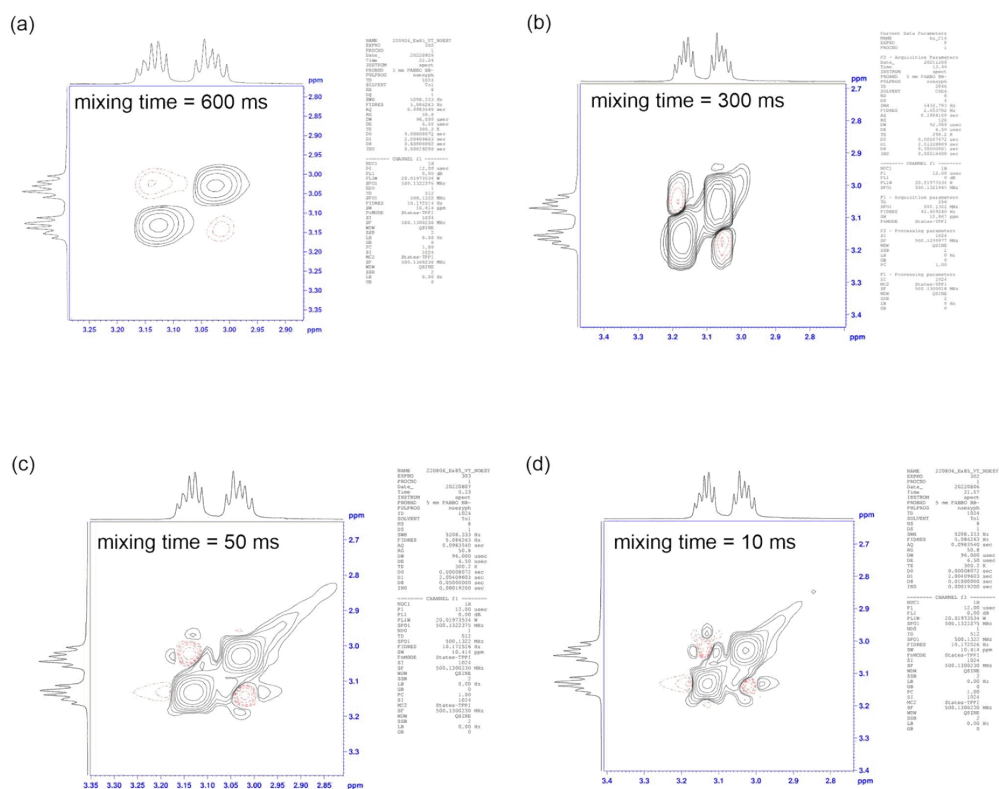

Fig. S17.  $^1\text{H}$ - $^1\text{H}$  EXSY(NOESY) spectra of **C16Np** at 300 K in toluene- $d_8$ : (a) mixing time = 600 ms, (b) mixing time = 300 ms, (c) mixing time = 100 ms, (d) mixing time = 50 ms.

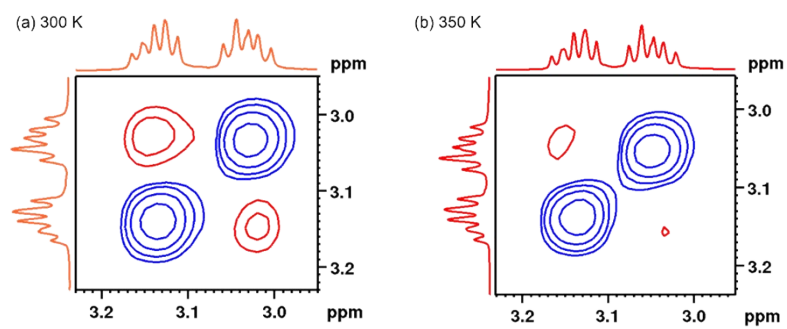

**Fig. S18.** <sup>1</sup>H -<sup>1</sup>H EXSY(NOESY) spectra of **C16Np** in toluene-*d*<sub>8</sub> (mixing time = 300 ms): (a) 300 K, (b) 350 K.

c. Temperature Dependent NMR of C18Np

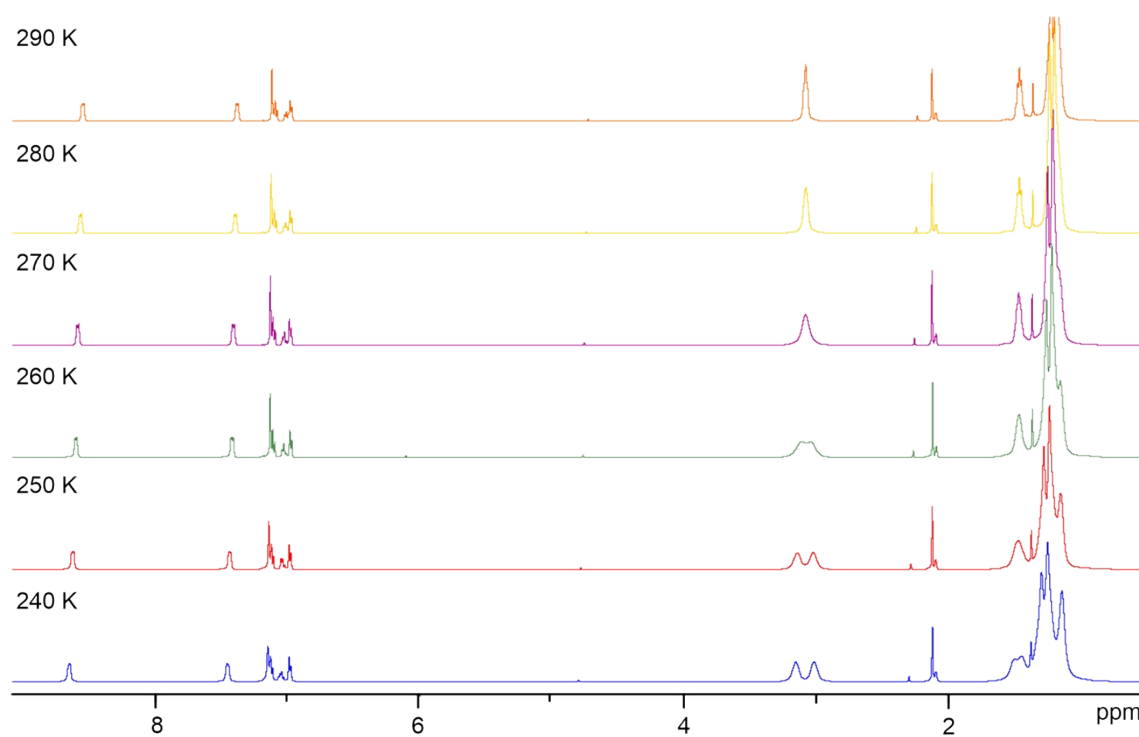

**Fig. S19.** Temperature dependent  $^1\text{H}$  NMR spectra of **C18Np** in toluene- $d_8$ .

**d. Analysis of Thermodynamic Parameters for Naphtylene Rotation in C18Np**

An activation energy for the ring flipping/rotation could be estimated the slope of an Eyring plot for temperature dependent exchange rates. From the plots, the following parameters were determined (errors are shown as standard deviations):

$$\Delta H^\ddagger = 13.0 \pm 0.13 \text{ kcal mol}^{-1}, \Delta S^\ddagger = 1.48 \pm 0.46 \text{ cal mol}^{-1} \text{ K}^{-1}$$

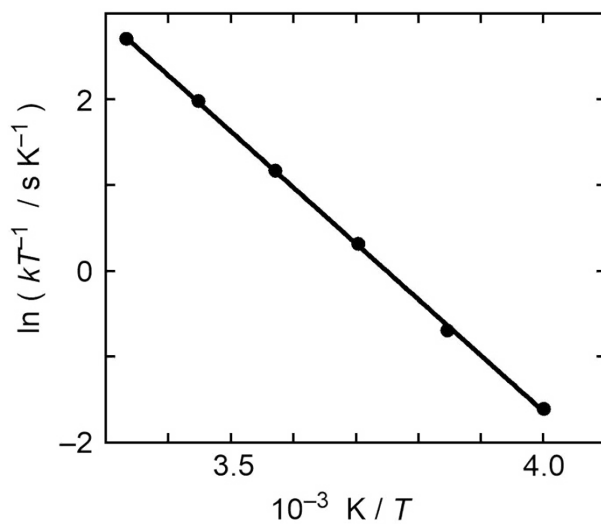

**Fig. S20.** Eyring plot for temperature dependent exchange rates for the rotation of the rotor in compound C18Np.

### 3. Details of X-ray Crystallography

Single-crystal X-ray crystallographic analyses were performed using a Bruker Venture diffractometer.

**Table S1.** Crystal Data

| Compound                             | C12Np                                                               | C14Np                                                               |                          |
|--------------------------------------|---------------------------------------------------------------------|---------------------------------------------------------------------|--------------------------|
| CCDC #                               | 2202293                                                             | 2202294                                                             |                          |
| Temperature                          | 100 K                                                               | 123 K                                                               |                          |
| Empirical formula                    | C34 H54 N2                                                          | C38 H62 N2                                                          |                          |
| Crystal shape                        | prism                                                               | prism                                                               |                          |
| Crystal color                        | colorless                                                           | colorless                                                           |                          |
| Crystal size                         | 0.420 x 0.400 x 0.280 mm <sup>3</sup>                               | 0.320 x 0.200 x 0.100 mm <sup>3</sup>                               |                          |
| Formula weight / g mol <sup>-1</sup> | 490.79                                                              | 546.89                                                              |                          |
| Crystal system                       | Monoclinic                                                          | Monoclinic                                                          |                          |
| Space group                          | <i>P</i> 2 <sub>1</sub> / <i>n</i>                                  | <i>P</i> 2 <sub>1</sub> / <i>c</i>                                  |                          |
| Z                                    | 4                                                                   | 4                                                                   |                          |
| Calculated density                   | 1.080 Mg/m <sup>3</sup>                                             | 1.063 Mg/m <sup>3</sup>                                             |                          |
| Cell parameter                       | <i>a</i>                                                            | 10.7668(3) Å                                                        | 11.7462(14) Å            |
|                                      | <i>b</i>                                                            | 18.0397(5) Å                                                        | 9.5109(12) Å             |
|                                      | <i>c</i>                                                            | 15.5823(5) Å                                                        | 30.593(4) Å              |
|                                      | $\alpha$                                                            | 90°                                                                 | 90°                      |
|                                      | $\beta$                                                             | 93.8990(10)°                                                        | 90.057(6)°               |
|                                      | $\gamma$                                                            | 90°                                                                 | 90°                      |
|                                      | <i>V</i>                                                            | 3019.54(15) Å <sup>3</sup>                                          | 3417.8(7) Å <sup>3</sup> |
| F(000)                               | 1088                                                                | 1216                                                                |                          |
| Absorption coefficient               | 0.455 mm <sup>-1</sup>                                              | 0.455 mm <sup>-1</sup>                                              |                          |
| $\theta$ range for collection (deg)  | 3.753 to 75.508° (Cu)                                               | 2.889 to 75.190° (Cu)                                               |                          |
| Index ranges                         | -13 ≤ <i>h</i> ≤ 13,<br>-21 ≤ <i>k</i> ≤ 22,<br>-19 ≤ <i>l</i> ≤ 18 | -14 ≤ <i>h</i> ≤ 14,<br>-10 ≤ <i>k</i> ≤ 11,<br>-38 ≤ <i>l</i> ≤ 38 |                          |
| Reflections collected                | 24260                                                               | 35956                                                               |                          |
| Independent reflections              | 6066 [R(int) = 0.0229]                                              | 6841 [R(int) = 0.0648]                                              |                          |
| Completeness                         | 97.8 %                                                              | 98.1 %                                                              |                          |
| Goodness-of-fit on F <sup>2</sup>    | 1.030                                                               | 1.144                                                               |                          |
| Final R indices [I > 2σ(I)]          | R1 = 0.0404, wR2 = 0.1057                                           | R1 = 0.0994, wR2 = 0.2720                                           |                          |
| R indices (all data)                 | R1 = 0.0413, wR2 = 0.1062                                           | R1 = 0.1059, wR2 = 0.2750                                           |                          |
| Largest diff. peak and hole          | 0.282 and -0.192 e.Å <sup>-3</sup>                                  | 0.448 and -0.412 e.Å <sup>-3</sup>                                  |                          |

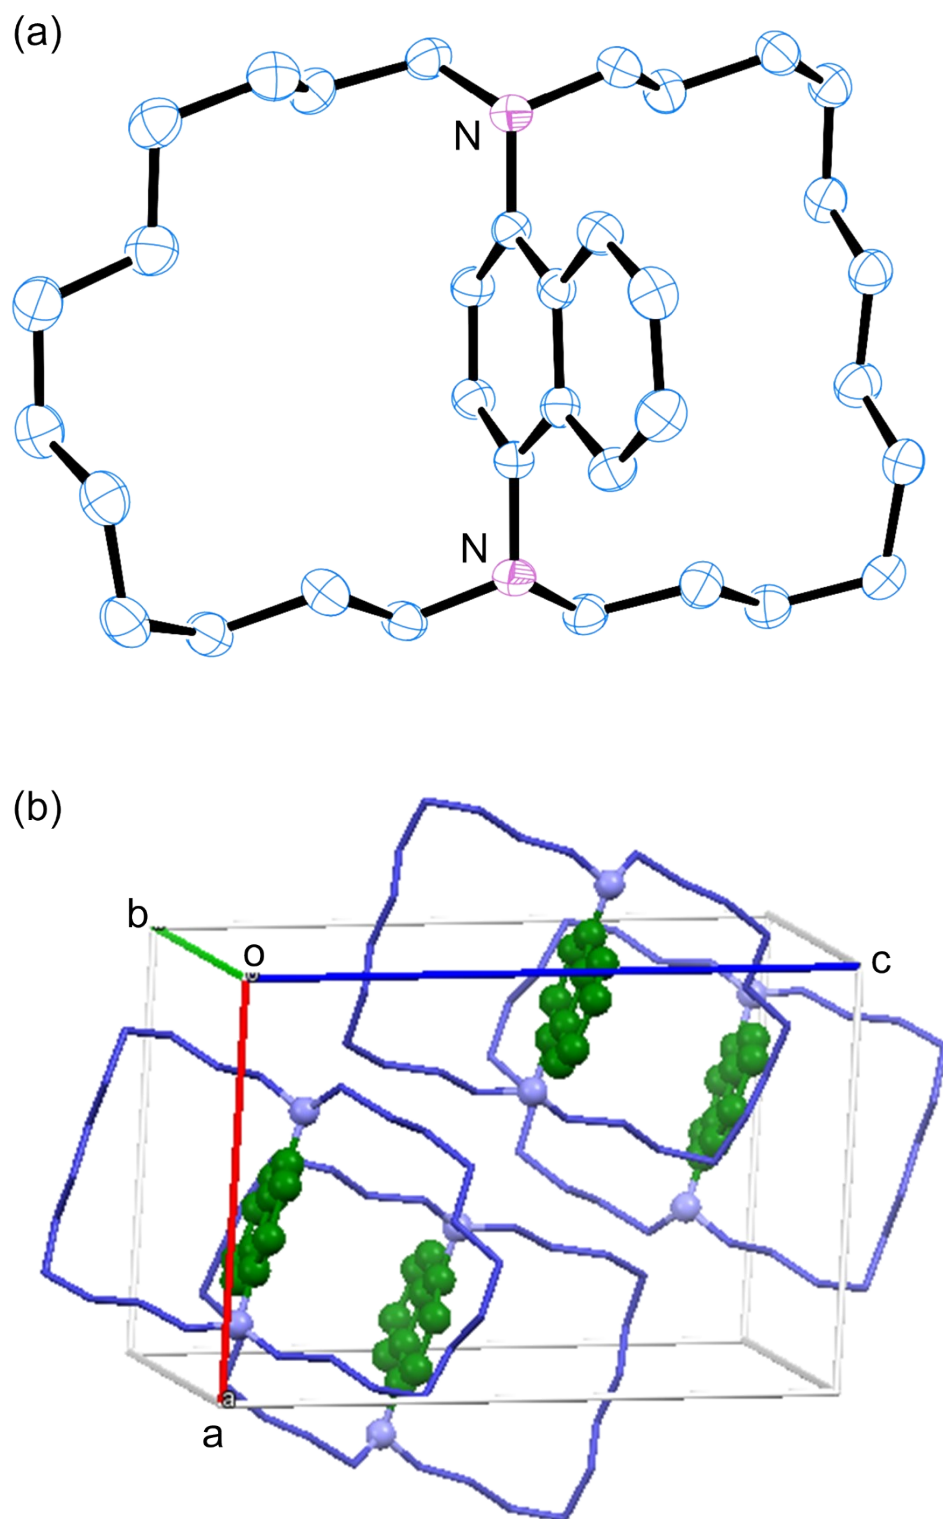

**Fig. S21.** (a) An ORTEP drawing (50% thermal ellipsoids) of molecular structure and (b) crystal packing structure of **C12Np** determined by X-ray crystallography.



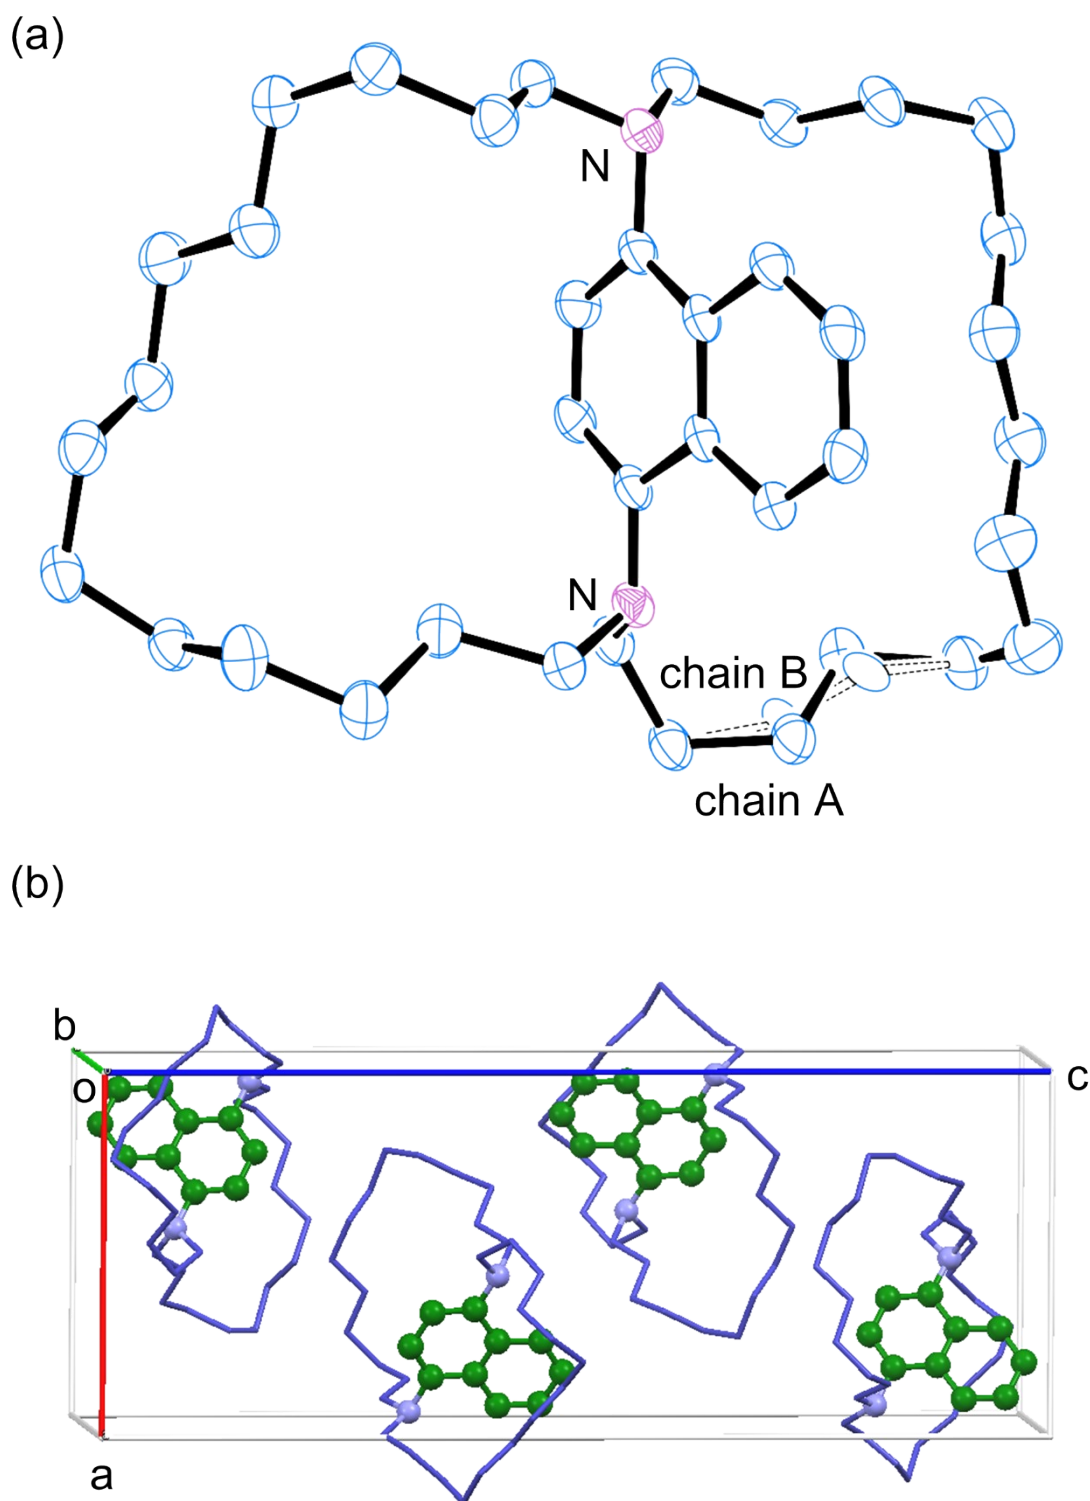

**Fig. S22.** (a) An ORTEP drawing (50% thermal ellipsoids) of molecular structure (the population ratio of the disordered atoms: chain A: chain B = 0.843 (10) : 0.157(10) ) and (b) crystal packing structure of **C14Np** determined by X-ray crystallography.
